# Supplementary material for: Two phase I dose-escalation/pharmacokinetics studies of low temperature liposomal doxorubicin (LTLD) and mild local hyperthermia in heavily pretreated patients with local regionally recurrent breast cancer
Source: PubMed Central journal article supplement — Int J Hyperthermia. 2014 Aug 21;30(5):285–94. doi: 10.3109/02656736.2014.936049 (PMC4162656; doi:10.3109/02656736.2014.936049), 2014-08-21
Supplement: HTH-30-285-s1.pdf [file HTH-30-285-s1.pdf]

**Supplemental Table 1  
Local Objective Response  
(Intent-to-Treat Population)**

| <b>Local Objective Response</b>                                                                                                          | <b>Celsion-Sponsored Trial<br/>N = 11</b> |       | <b>Duke-Sponsored Trial<br/>N = 18</b> |       | <b>Both Trials Combined<br/>N = 29</b> |       |
|------------------------------------------------------------------------------------------------------------------------------------------|-------------------------------------------|-------|----------------------------------------|-------|----------------------------------------|-------|
| None                                                                                                                                     | 6                                         | 54.5% | 9                                      | 50.0% | 15                                     | 51.7% |
| Partial                                                                                                                                  | 4                                         | 36.4% | 5                                      | 27.8% | 9                                      | 31.0% |
| Complete                                                                                                                                 | 1                                         | 9.1%  | 4                                      | 22.2% | 5                                      | 17.2% |
| Local objective response in the two trials is not significantly different:<br>P = 0.6317 by exact Wilcoxon-Mann-Whitney test, two-tailed |                                           |       |                                        |       |                                        |       |

**Supplemental Table 2**

**Survival Analysis Summary for the Duke-Sponsored Trial**

| <b>Efficacy Measure /<br/>ThermoDox Dose Level</b> | <b>Failed</b> | <b>Censored</b> | <b>Median<br/>(Months)</b> | <b>P-Value<sup>1</sup></b> |
|----------------------------------------------------|---------------|-----------------|----------------------------|----------------------------|
| <b>Time to Local Progression</b>                   |               |                 |                            | 0.6396                     |
| 20 mg/m <sup>2</sup>                               | 1             | 2               | 4.7                        |                            |
| 30 mg/m <sup>2</sup>                               | 3             | 3               | 4.9                        |                            |
| 40 mg/m <sup>2</sup>                               | 5             | 4               | 5.8                        |                            |
| All Dose Levels                                    | 9             | 9               | 4.9                        |                            |
| <b>Overall Survival</b>                            |               |                 |                            | 0.6648                     |
| 20 mg/m <sup>2</sup>                               | 3             | 0               | 9.6                        |                            |
| 30 mg/m <sup>2</sup>                               | 6             | 0               | 15.0                       |                            |
| 40 mg/m <sup>2</sup>                               | 8             | 1               | 8.0                        |                            |
| All Dose Levels                                    | 17            | 1               | 9.0                        |                            |
| <b>Local Progression-Free Survival</b>             |               |                 |                            | 0.2510                     |
| 20 mg/m <sup>2</sup>                               | 3             | 0               | 7.6                        |                            |
| 30 mg/m <sup>2</sup>                               | 6             | 0               | 4.6                        |                            |
| 40 mg/m <sup>2</sup>                               | 9             | 0               | 4.6                        |                            |
| All Dose Levels                                    | 18            | 0               | 4.8                        |                            |

<sup>1</sup> Exact logrank test, two-tailed

**Supplemental Table 3**

**Overall Survival in the Duke-Sponsored Trial (Months)**

| <b>20 mg/m<sup>2</sup></b>                                                                                                    | <b>30 mg/m<sup>2</sup></b> | <b>40 mg/m<sup>2</sup></b> | <b>All Dose Levels</b> |
|-------------------------------------------------------------------------------------------------------------------------------|----------------------------|----------------------------|------------------------|
| 7.6                                                                                                                           | 3.4                        | 1.6                        | 1.6                    |
| 9.6                                                                                                                           | 6.0                        | 2.3                        | 2.3                    |
| 44.3                                                                                                                          | 8.3                        | 3.5                        | 3.4                    |
|                                                                                                                               | 21.7                       | 5.9                        | 3.5                    |
|                                                                                                                               | 23.5                       | 8.0                        | 5.9                    |
|                                                                                                                               | 25.3                       | 10.0                       | 6.0                    |
|                                                                                                                               |                            | 10.4                       | 7.6                    |
|                                                                                                                               |                            | 10.4                       | 8.0                    |
|                                                                                                                               |                            | 30.2+                      | 8.3                    |
|                                                                                                                               |                            |                            | 9.6                    |
|                                                                                                                               |                            |                            | 10.0                   |
|                                                                                                                               |                            |                            | 10.4                   |
|                                                                                                                               |                            |                            | 10.4                   |
|                                                                                                                               |                            |                            | 21.7                   |
|                                                                                                                               |                            |                            | 23.5                   |
|                                                                                                                               |                            |                            | 25.3                   |
|                                                                                                                               |                            |                            | 30.2+                  |
|                                                                                                                               |                            |                            | 44.3                   |
| Median: 9.6                                                                                                                   | Median: 15.0               | Median: 8.0                | Median: 9.0            |
| Overall survival is not significantly different across ThermoDox dose levels:<br>P = 0.6648 by exact logrank test, two-tailed |                            |                            |                        |
